# Supplementary material
Source: PubMed Central journal article supplement (PMC7785021)
Supplement: 41386_2020_833_MOESM1_ESM.pdf [file 41386_2020_833_MOESM1_ESM.pdf]

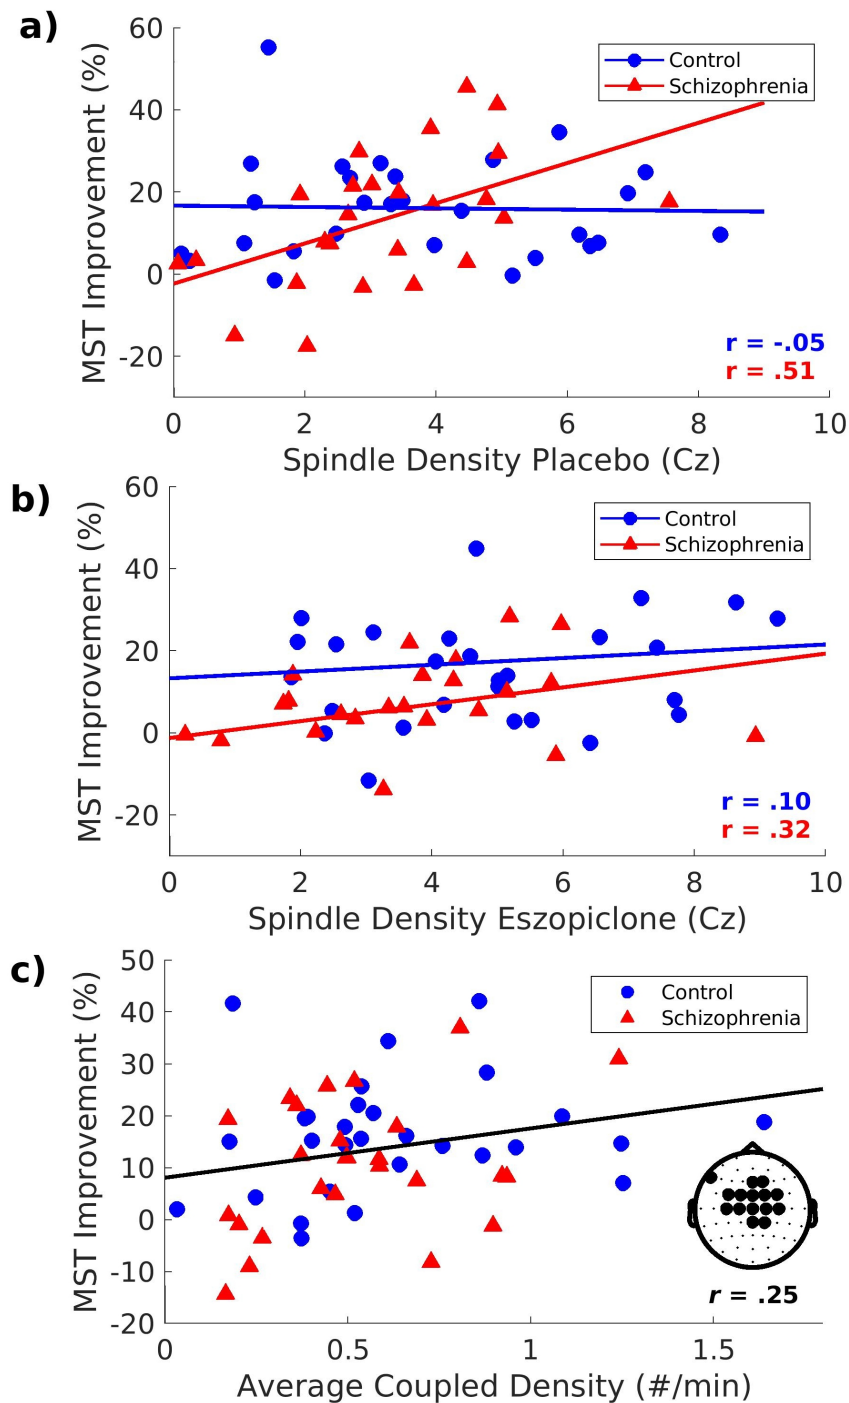

**Figure S7. Relations of Overnight MST Improvement with N3 Sleep parameters.** a) Spindle density at Cz on the MST night plotted against overnight MST improvement by group for the placebo and b) eszopiclone visits. c) Density of spindle-SO events on the MST night plotted against overnight MST improvement, averaged over the placebo and eszopiclone visits, in the cluster showing a non-significant correlation ( $p_{uncorrected} < .05$ , inset). The regression line for the combined groups and visits is shown.
