# Supplementary material
Source: PubMed Central journal article supplement (PMC7785021)
Supplement: 41386_2020_833_MOESM3_ESM.pdf [file 41386_2020_833_MOESM3_ESM.pdf]

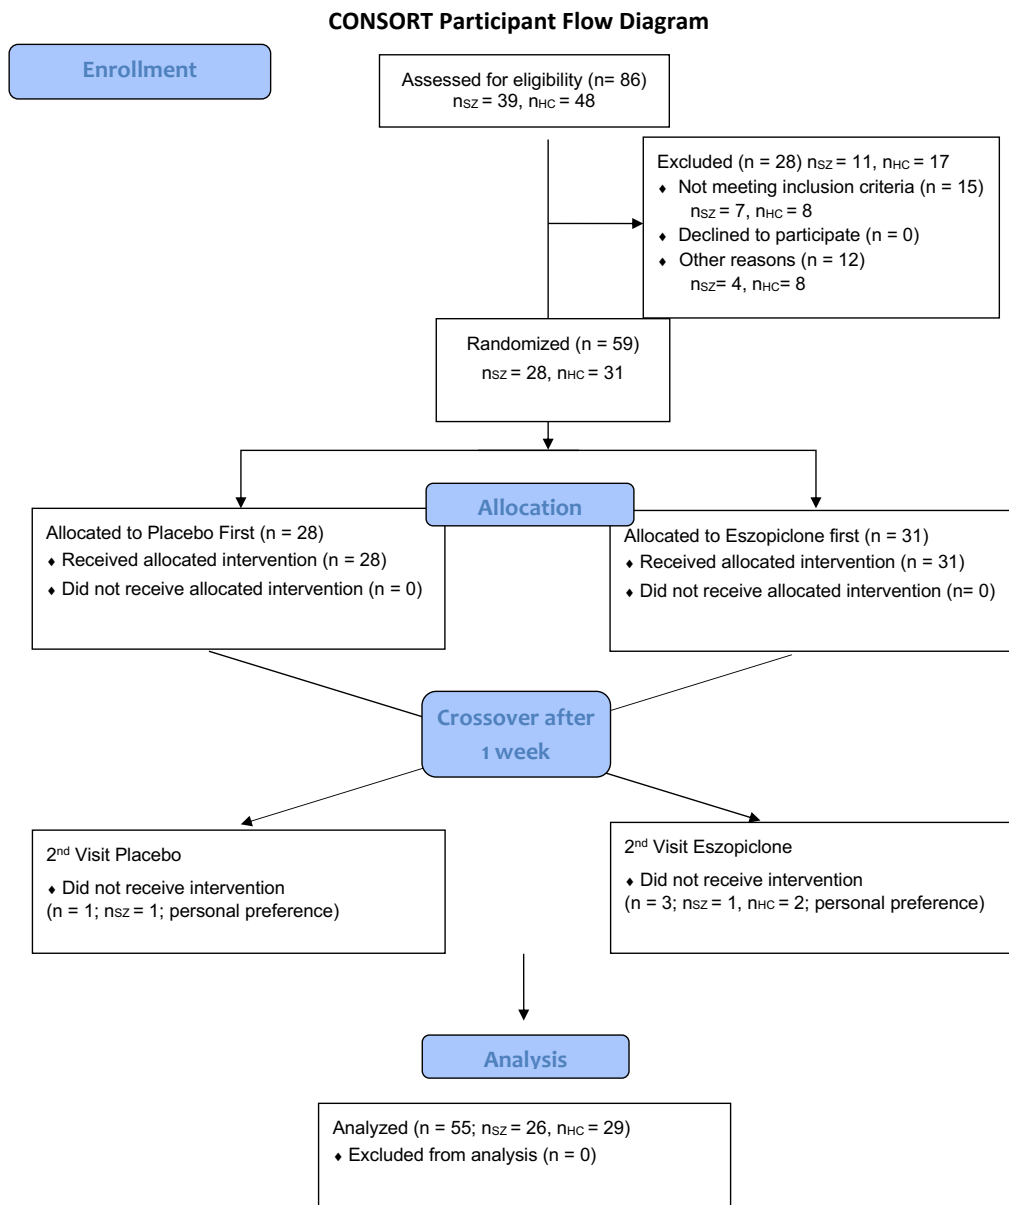

**Figure S1. Consort participant flow diagram.** Participants were enrolled between July 2012 and December 2015. The target sample size was based on the difference in overnight MST improvement between the placebo ( $M \pm SD$ :  $1.5 \pm 20.6\%$ ;  $n=11$ ) and eszopiclone ( $20.5 \pm 23.4\%$ ;  $n=10$ ) groups in our pilot study of schizophrenia, which gave a power of .90 with 28 participants [6]. The trial ended when the recruitment goals were met. SZ=schizophrenia; HC=healthy control.
