# Supplementary material
Source: PubMed Central journal article supplement (PMC7785021)
Supplement: 41386_2020_833_MOESM5_ESM.pdf [file 41386_2020_833_MOESM5_ESM.pdf]

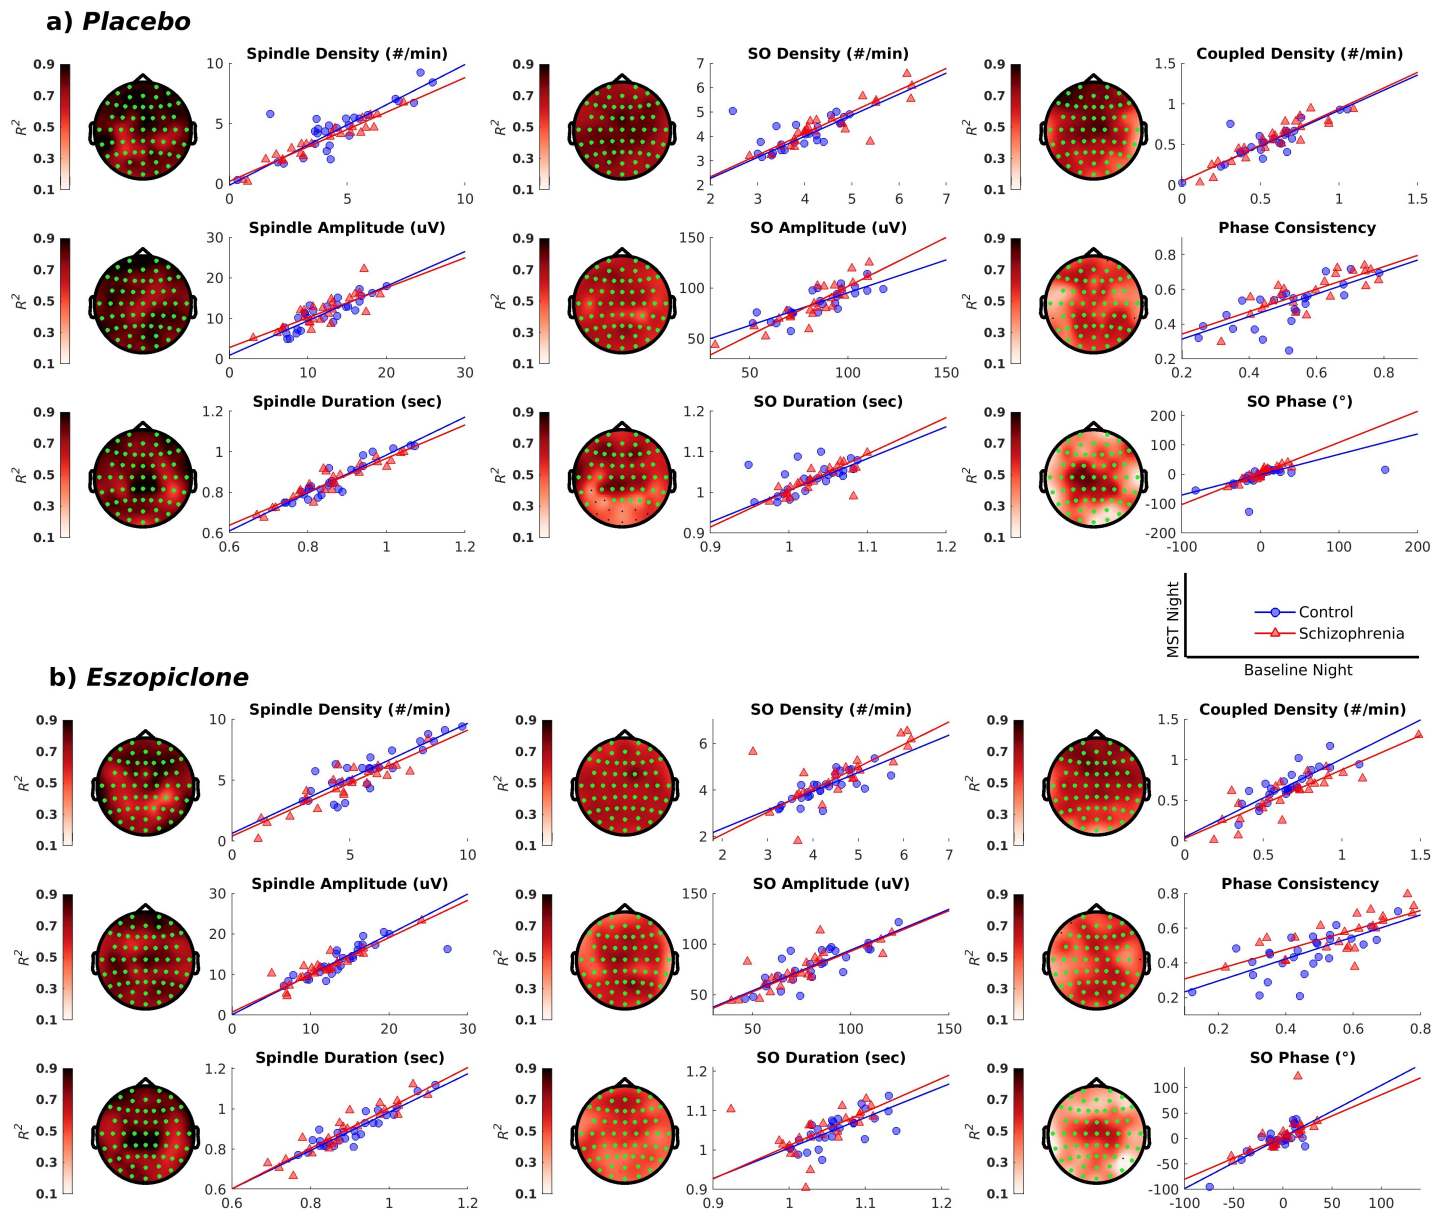

**Figure S3: Reliability of N2 spindle, SO and spindle-SO coordination parameters across nights.** a) Placebo visit; b) Eszopiclone visit. Topographic maps show regression models for the combined groups. Electrodes highlighted in green form significant clusters. Data from Cz is plotted for the baseline night against the MST night with separate regression lines for controls and patients. All parameters were highly reliable across nights for both groups at both visits.
