# Supplementary material
Source: PubMed Central journal article supplement (PMC7785021)
Supplement: 41386_2020_833_MOESM6_ESM.pdf [file 41386_2020_833_MOESM6_ESM.pdf]

**a) N2**

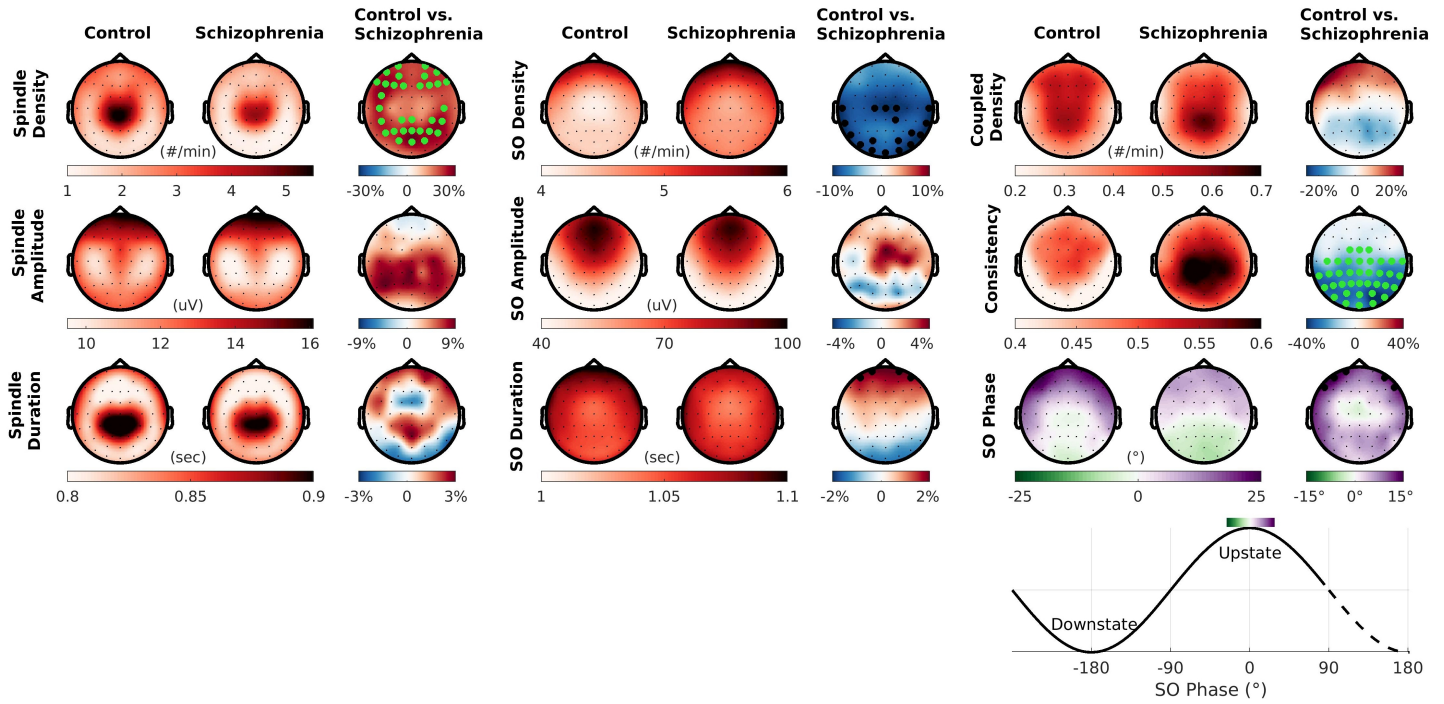

**b) N3**

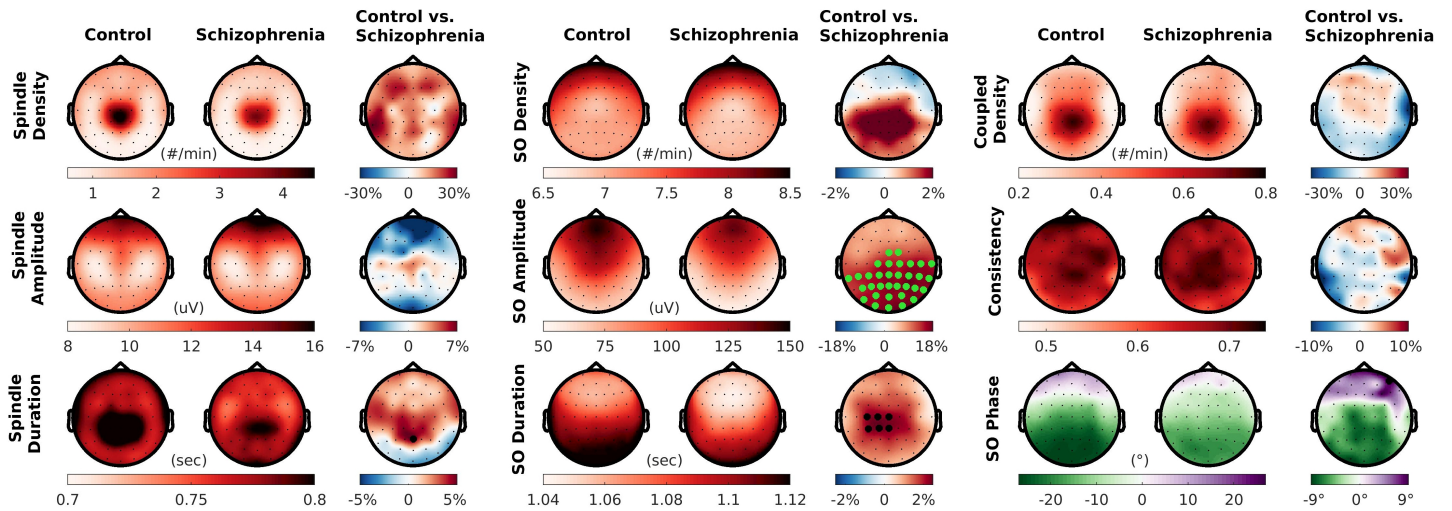

**Figure S4. Group differences in N2 and N3 spindle, SOs and spindle-SO coordination parameters.** Topographical maps of (a) N2 and (b) N3 sleep parameters for controls and patients and statistical maps of their difference. Data is averaged across nights and visits. In group difference maps, electrodes with a cluster-corrected  $p < .05$  and  $p_{uncorrected} < .05$  are highlighted with green and black respectively. Inset: Mapping of SO phase to color map.
