# Supplementary material
Source: PubMed Central journal article supplement (PMC7785021)
Supplement: 41386_2020_833_MOESM7_ESM.pdf [file 41386_2020_833_MOESM7_ESM.pdf]

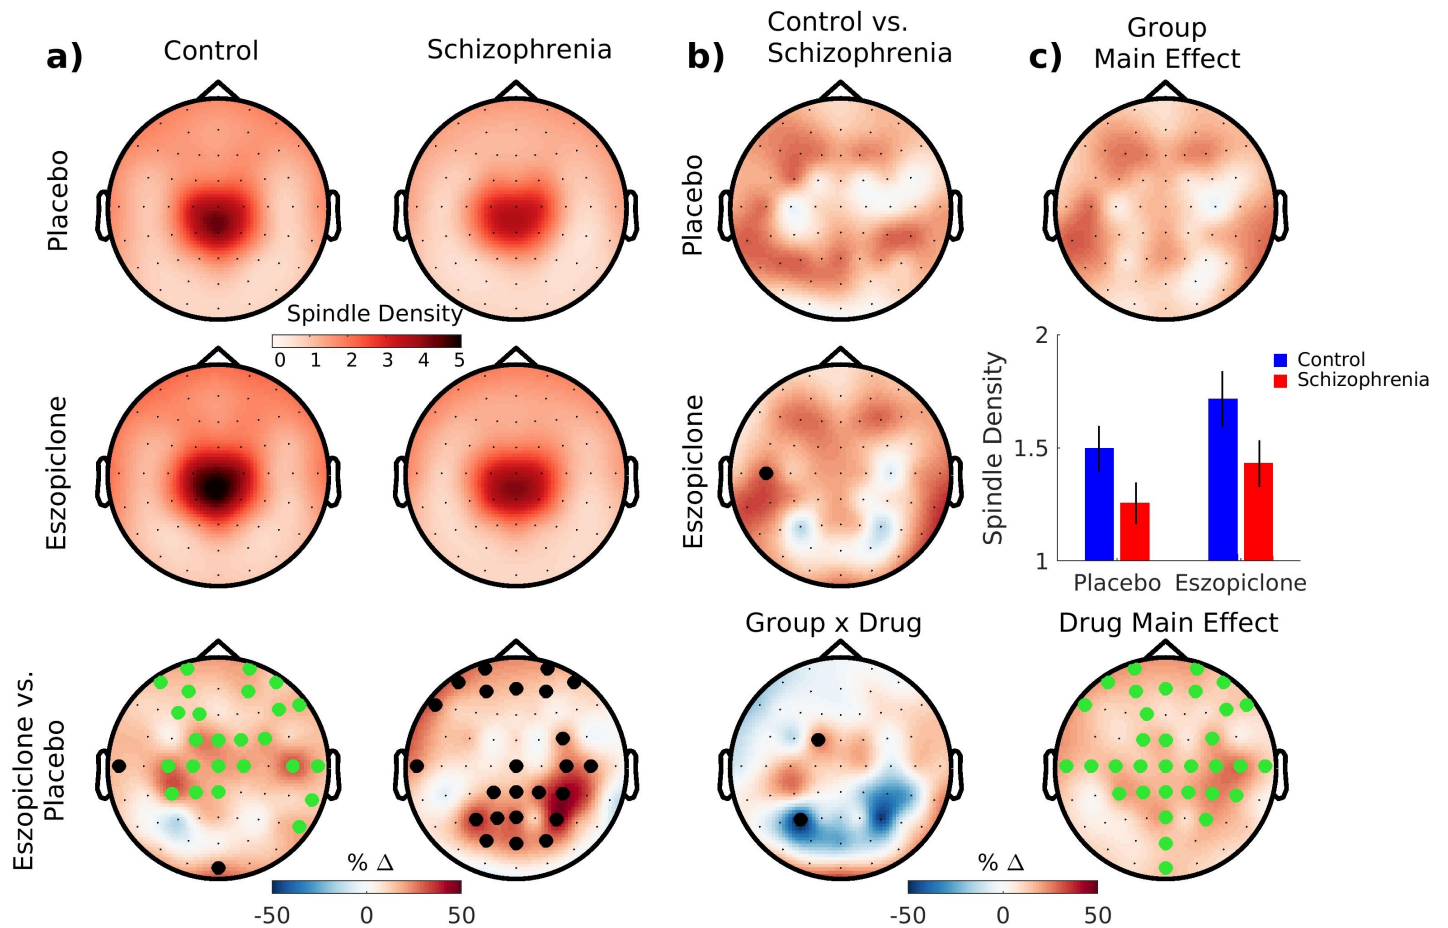

**Figure S5. Eszopiclone effects on N3 sleep spindle density.** a) Topographical maps of spindle density, averaged across nights, at the placebo and eszopiclone visits for each group and the comparison of the two visits. Electrodes with a cluster-corrected  $p < .05$  and  $p_{uncorrected} < .05$  are highlighted in green and black respectively. b) Group difference maps (top and middle rows) show non-significantly greater spindle density in controls than patients at most electrodes. Bottom row: Group by Drug interaction showing electrodes where the eszopiclone effect of increasing spindle density non-significantly differed by group (blue is greater in patients; red is greater in controls). c) Top row: Main effect of Group on spindle density showing non-significantly greater spindle density in controls than patients at most electrodes. Middle row: Bar graph of spindle density averaged across all electrodes with standard error bars. Bottom row: Drug main effect eszopiclone significantly increased spindle density in a cluster of 33 electrodes.
