# Supplementary material
Source: PubMed Central journal article supplement (PMC7785021)
Supplement: 41386_2020_833_MOESM8_ESM.pdf [file 41386_2020_833_MOESM8_ESM.pdf]

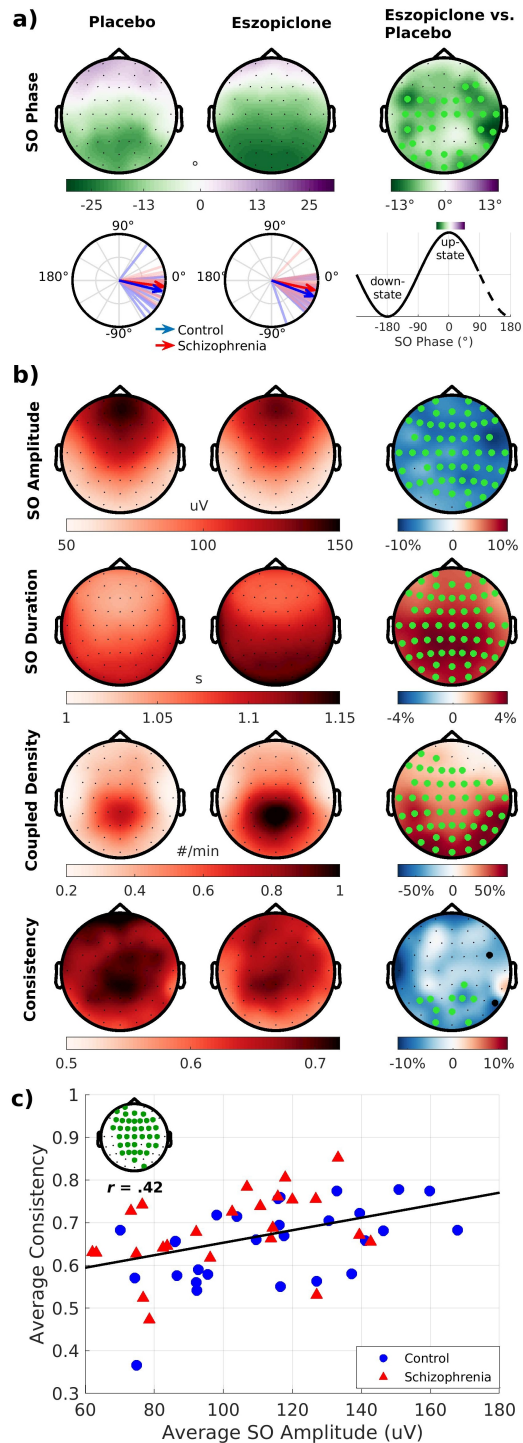

**Figure S6. Eszopiclone effects on N3 SOs and their coordination with spindles.** a) Topographical maps of mean SO phase at spindle peak during the placebo and eszopiclone visits (averaged across groups and nights) and a statistical map of their difference. On eszopiclone, spindles peaked earlier in the SO upstate. Electrodes highlighted in green meet a cluster corrected threshold of  $p < .05$ . Circular plots show SO phase at Cz. Lines represent the mean SO phase for each participant. Arrows represent group means and their length represents the consistency of the spindle-SO phase locking across participants. Right column: Mapping of SO phase to topographical maps and circular plots. b) Topographical maps of SO and spindle-SO coordination parameters during the placebo and eszopiclone visits and statistical maps of their difference. Electrodes with a cluster-corrected  $p < .05$  and  $p_{uncorrected} < .05$  are highlighted with green and black respectively. c) Plot of the relation of SO amplitude with spindle-SO phase consistency, averaged over the placebo and eszopiclone visits in the cluster showing a significant correlation (inset shows significant cluster). Regression line is for the combined groups and drug visits.
